# Supplementary material for: Long-term health of women with genetic POI due to FSH-resistant ovaries
Source: PubMed Central journal article supplement (PMC6790899; doi:10.1530/ec-19-0244), 2019-09-09

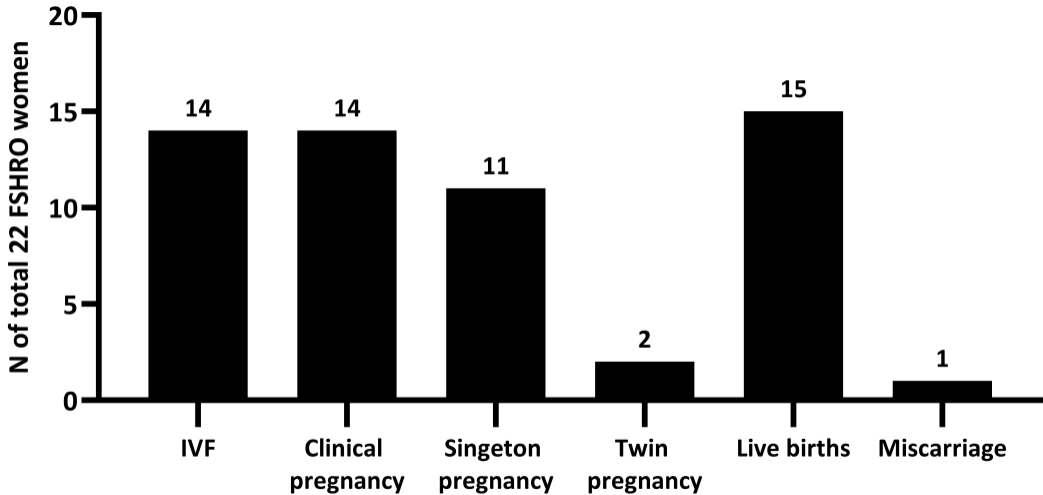

Supplement: supplementary_figure_1.pdf [file supplementary_figure_1.pdf]
