# Supplementary material for: Long-term health of women with genetic POI due to FSH-resistant ovaries
Source: PubMed Central journal article supplement (PMC6790899; doi:10.1530/ec-19-0244), 2019-09-09
Supplement: supplementary_table_1.pdf [file supplementary_table_1.pdf]

### Supplementary table 1

|                                     | FSHRO Q+C |           |      | FSHRO Q |           |      |
|-------------------------------------|-----------|-----------|------|---------|-----------|------|
|                                     |           | range     | ±SD  |         | range     | ±SD  |
| <b>N</b>                            | 14        |           |      | 8       |           |      |
| <b>Age</b>                          | 49.6      | 28-70     | 11.5 | 49.6    | 30-70     | 15.1 |
| <b>Height (m), mean</b>             | 1.63      | 1.54-1.71 | 0.1  | 1.61    | 1.56-1.70 | 0.1  |
| <b>BMI (kg/m<sup>2</sup>), mean</b> | 24.8      | 20.6-41.3 | 5.5  | 27.3    | 21.9-32.9 | 4.0  |

Comparison on of the demographic characteristics of the FSHRO women who took part in both questionnaire and clinical examination (Q+C) and FSHRO women who only returned the questionnaire (Q).
